# Supplementary material for: NaHS inhibits NF-κB signal against inflammation and oxidative stress in post-infectious irritable bowel syndrome
Source: Royal Society of Chemistry journal article supplement (doi:10.1039/c6ra13849g), 2016-01-01
Supplement: c6ra13849g1.pdf [file c6ra13849g1.pdf]

Supplementary Table

Table 1. PCR primers used in this study.

| Gene           | Accession No. | Nucleotide sequence of primers (5'-3')                            | Size (bp) |
|----------------|---------------|-------------------------------------------------------------------|-----------|
| $\beta$ -Actin | NM_007393.3   | F:GTC CAC CTT CCA GCA GAT GT<br>R:GAA AGG GTG TAA AAC GCA GC      | 117       |
| IL-1 $\beta$   | NM_008361.3   | F:CTG TGA CTC GTG GGA TGA TG<br>R:GGG ATT TTG TCG TTG CTT GT      | 213       |
| IL-4           | NM_021283.2   | F: CCA TAT CCA CGG ATG CGA CA<br>R: AAG CCC GAA AGA GTC TCT GC    | 254       |
| IL-6           | NM_031168.1   | F: TGC AAG AGA CTT CCA TCC AGT<br>R: GTG AAG TAG GGA AGG CCG      | 116       |
| IL-10          | NM_010548.2   | F: ACA GCC GGG AAG ACA ATA AC<br>R: CAG CTG GTC CTT TGT TTG AAA G | 116       |
| IL-17          | NM_010552.3   | F:TAC CTC AAC CGT TCC ACG TC<br>R:TTT CCC TCC GCA TTG ACA C       | 119       |
| TNF- $\alpha$  | NM_013693.2   | F:AGG CAC TCC CCC AAA AGA T<br>R:TGA GGG TCT GGG CCA TAG AA       | 192       |

F: forward primers; R: reverse primers.

Table 2. Serum CAT activity and GSH abundance.

| Item                | Cont               | PI-IBS             | NaHS               |
|---------------------|--------------------|--------------------|--------------------|
| CAT (U/ml)          | 18.32 $\pm$ 4.27   | 23.84 $\pm$ 5.31   | 22.17 $\pm$ 3.95   |
| GSH ( $\mu$ mol/ml) | 638.28 $\pm$ 55.37 | 738.53 $\pm$ 42.18 | 762.19 $\pm$ 63.49 |
